# Supplementary material for: Overexpression of human wild-type FUS causes progressive motor neuron degeneration in an age- and dose-dependent fashion
Source: Springer Nature journal article supplement (doi:10.1007/s00401-012-1043-z), 2012-09-08
Supplement: MOESM4 [file 8404026]

## Acta Neuropathologica

### Overexpression of human wild-type FUS causes progressive motor neuron degeneration in an age and dose-dependent fashion

Jacqueline C Mitchell, Philip McGoldrick, Caroline Vance, Jemeen Sreedharan, Boris Rogelj, Elizabeth L. Tudor, Bradley N Smith, Christian Klasen, Christopher C J Miller, Jonathan D Cooper, Linda Greensmith, Christopher E Shaw<sup>†</sup>

<sup>†</sup>Corresponding author: [christopher.shaw@kcl.ac.uk](mailto:christopher.shaw@kcl.ac.uk), King's Centre for Neurodegeneration Research, Kings College London, Departments Of Clinical Neurosciences<sup>1</sup> and <sup>3</sup>Neuroscience, Institute of Psychiatry, London SE5 8AF

### Supporting Information

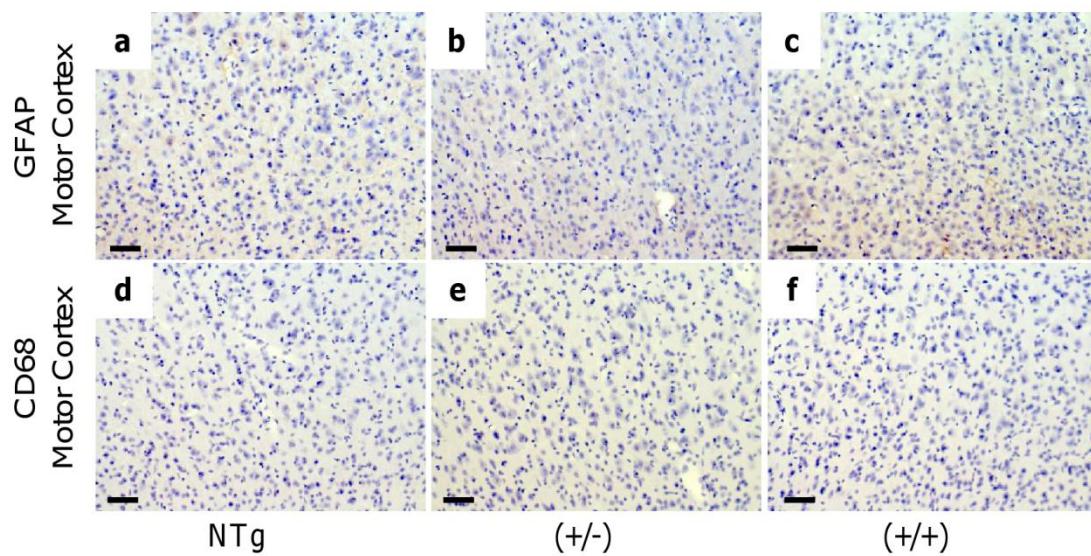

#### **Figure S1 hFUS overexpression does not alter neuroinflammation in the cortex.**

(a-c) No changes in astroglia, detected using GFAP immunohistochemistry (d-f) or microglia, detected using CD68 immunohistochemistry, were detected in hFUS (+/-) or (+/+) animals (scale bar: 20 $\mu$ m)

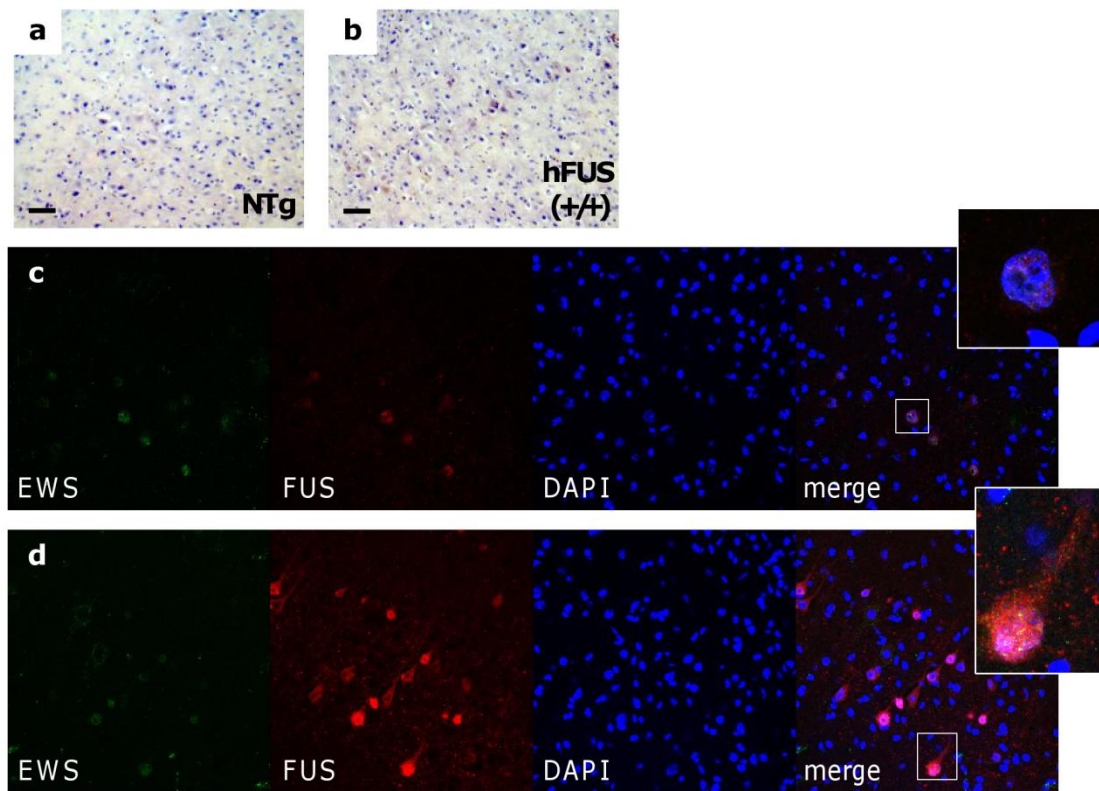

**Figure S2 FUS does not colocalise with EWS or TAF15 in the cortex of hFUS (+/+) mice.**

(a-b) No significant TAF15 staining was detected in NTg (A) or hFUS (+/+) (b) mice. (c-d) Low level EWS staining was detected in the nucleus of FUS positive cells in both NTg (c) and hFUS (+/+) (d) mice. However, total EWS levels did not appear to differ between NTg and hFUS (+/+) mice, and there was no evidence of FUS and EWS cytoplasmic colocalisation in hFUS (+/+) animals

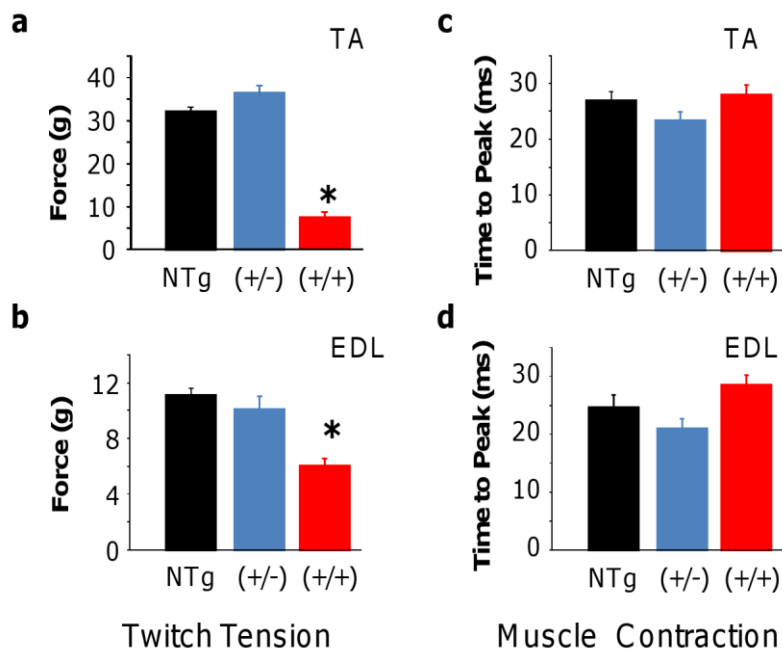

**Figure S3 Impaired twitch force but normal muscle contraction in hFUS homozygous mice.**

(a-b) Twitch force production of the hindlimb TA (A) and EDL (B) muscles was significantly reduced in hFUS (+/+) mice compared to NTg mice, with a deficit in force of approximately 80% and 20% in the TA and EDL respectively (\* $p < 0.001$ ). (c-d) Muscle contraction measured as time to peak in both muscles was not significantly altered in response to hFUS overexpression
